# Supplementary material for: Complex coacervate core micro-emulsions
Source: Royal Society of Chemistry journal article supplement (doi:10.1039/b802148a), 2008-01-01
Supplement: b802148a.pdf [file b802148a.pdf]

Supplementary Information  
to “Complex coacervate core micro-emulsions”

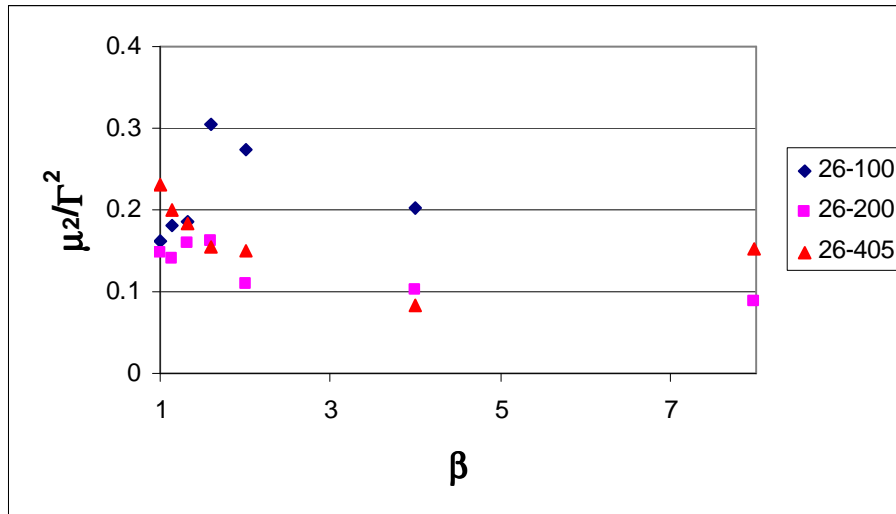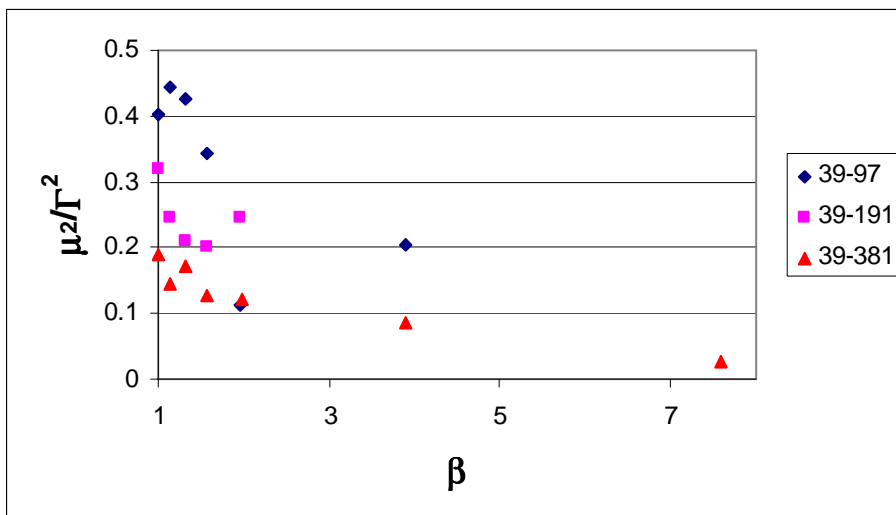

Figure S1:  $\mu_2/\Gamma^2$ , from the cumulant fit to the autocorrelation function as obtained from dynamic light scattering measurements, as a function of  $\beta$ . Top: for complex coacervate core micro-emulsions (C3-  $\mu$ Es) composed of PDMAEMA<sub>150</sub>, PAA<sub>140</sub> and PAA<sub>x</sub>-PAAM<sub>y</sub>, x being 26 and y being 100, 200 and 405. Bottom: for C3-  $\mu$ Es composed of PDMAEMA<sub>150</sub>, PAA<sub>140</sub> and PAA<sub>x</sub>-PAAM<sub>y</sub>, x being 39 and y being 97, 191 and 381. All experiments were on C3-  $\mu$ Es in 10 mM ionic strength phosphate buffer, pH 7.1. Legend on the right.
